# Supplementary material
Source: MDPI journal article supplement (https://www.mdpi.com/2073-4395/11/5/991)
Supplement: s1 [file s1 › agronomy-1210596-supplementary.pdf]

**Figure S1.** Frequency plots for the qualitative traits measured in the 610 analyzed specimens of *Vigna unguiculata*, collected in 10 landraces, and the two commercial varieties. Names of landraces follow Table 1.

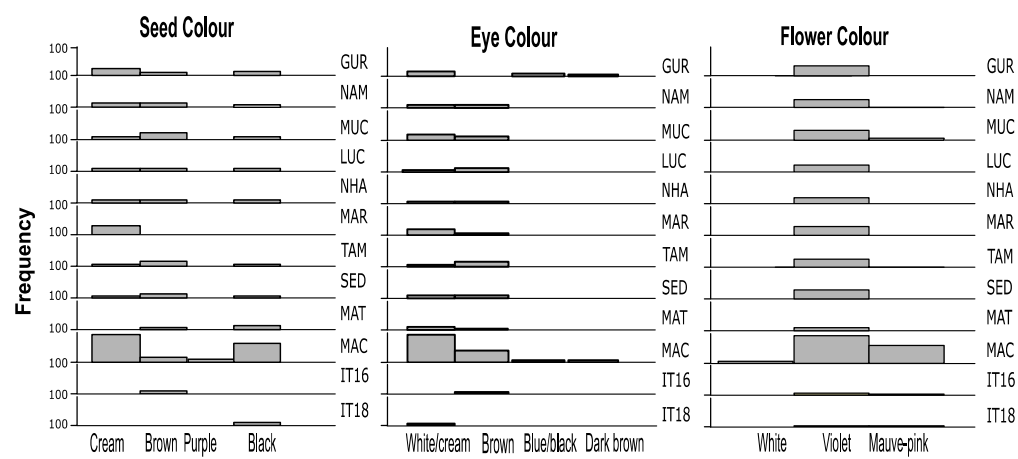

**Table S1.** Characterization of the 34 Bioversity International cowpea descriptors used to assess morphological variation in *Vigna unguiculata*.

| ID | COWPEA DESCRIPTORS           | GRADING SCALE                                                                                                                                                                                                                                                                                            |
|----|------------------------------|----------------------------------------------------------------------------------------------------------------------------------------------------------------------------------------------------------------------------------------------------------------------------------------------------------|
|    | <b>SEED</b>                  |                                                                                                                                                                                                                                                                                                          |
| 1  | Seed shape                   | 1: Kidney, 2: Ovoid, 3: Crowder, 4: Globose, 5: Rhomboid                                                                                                                                                                                                                                                 |
| 2  | Seed colour                  | 1: White, 2: Cream, 3: Brown, 4: Red, 5: Purple, 6: Black, 9: Other                                                                                                                                                                                                                                      |
| 3  | Testa texture                | 1: Smooth, 3: Smooth to Rough, 5: Rough (fine reticulation), 7: Rough to wrinkled, 9: Wrinkled (coarse folds on the testa)                                                                                                                                                                               |
| 4  | Eye pattern                  | 0: Absent A, 1: Very Small A, 2: Kabba group, 3: Narrow eye, 4: Small eye, 5: Holstein group, 6: Watson group, 7: Self-coloured, 8: Other                                                                                                                                                                |
| 5  | Eye colour                   | 0: Eye absent (white, cream), 1: Brown splash or grey, 2: Tan Brown, 3: Red, 4: Green, 5: Blue to black, 6: Blue to black spots or mottle, 7: Speckled (even distribution of fine speckling), 8: Mottled (dark brown pigment typically absent around hilum), 9: Mottled and speckled (Victor), 10: Other |
| 6  | Seed length (mm)             | Mean of 10 mature seeds excluding those from the extremities of pods                                                                                                                                                                                                                                     |
| 7  | Seed width (mm)              | Mean width from hilum to keel of the 10 seeds measured for length                                                                                                                                                                                                                                        |
| 8  | Seed thickness (mm)          | Mean thickness of the 10 seeds measured for length; measured perpendicular to length and width                                                                                                                                                                                                           |
| 9  | Seed weight (mg)             | Weight of 100 seeds moisture content 12%                                                                                                                                                                                                                                                                 |
|    | <b>VEGETATIVE</b>            |                                                                                                                                                                                                                                                                                                          |
| 10 | Hypocotyl length (mm)        | Mean of 10 plants                                                                                                                                                                                                                                                                                        |
| 11 | Leaf colour                  | 3: Pale Green, 5: Intermediate green, 7: Dark green                                                                                                                                                                                                                                                      |
| 12 | Leaf texture                 | 1: Cariaceous, 2: Intermediate, 3: Membranous                                                                                                                                                                                                                                                            |
| 13 | Leaf marking                 | Presence/absence of V-mark on leaflets: 0: Absent, 1: Present                                                                                                                                                                                                                                            |
| 14 | Terminal leaflet shape       | Measured 6 weeks after sowing: 1: Globose, 2: Sub-globose, 3: Sub-hastate, 4: Hastate                                                                                                                                                                                                                    |
| 15 | Terminal leaflet length (mm) | Terminal leaflet whose shape was recorded                                                                                                                                                                                                                                                                |
| 16 | Terminal leaflet width (mm)  | The widest dimension of the terminal leaflets whose shape was recorded                                                                                                                                                                                                                                   |
| 17 | Number of main branches      | Mean of 10 randomly selected plants: recorded 8 <sup>th</sup> weeks after sowing                                                                                                                                                                                                                         |
| 18 | Number of nodes on main stem | Mean of 10 randomly selected plants: recorded 3-4 weeks after sowing                                                                                                                                                                                                                                     |

|                                        |                           |                                                                                                                                                                                   |
|----------------------------------------|---------------------------|-----------------------------------------------------------------------------------------------------------------------------------------------------------------------------------|
| 19                                     | Stipule width (mm)        |                                                                                                                                                                                   |
| 20                                     | Stipule length (mm)       |                                                                                                                                                                                   |
| 21                                     | Growth habit              | 1: Determinate, 2: Indeterminate bush, 3: Indeterminate spreading not climbing, 4: Indeterminate twining and climbing, 5: Other                                                   |
| 22                                     | Twinning tendency         | 0: None, 3: Slight, 5: Intermediate, 7: Pronounced                                                                                                                                |
| 23                                     | Plant pigmentation        | 0: None, 1: Very slight, 3: Moderate at the base and tips of petioles, 5: Intermediate, 7: Extensive, 9: Solid                                                                    |
| 24                                     | Plant hairiness           | 3: Glabrescent, 5: Short appressed hairs, 7: Pubescent to hirsute                                                                                                                 |
| 25                                     | Plant vigour              | 3: Non-vigorous, 5: Intermediate, 7: vigorous, 9: very vigorous                                                                                                                   |
| 26                                     | Plant height (mm)         |                                                                                                                                                                                   |
| 27                                     | Plant diameter (mm)       |                                                                                                                                                                                   |
| 28                                     | Stem diameter (mm)        |                                                                                                                                                                                   |
| <b>PEST AND DISEASE SUSCEPTIBILITY</b> |                           |                                                                                                                                                                                   |
| 29                                     | Early pest incidence      | Scored for natural infestation on a 1-5 scale, where 1 – non infested, 2-Low infestation, 3-moderately infested, 5-High susceptibility                                            |
| 30                                     | Early rust incidence      | Scored for natural infection on a 1-5 scale, where 1 – non-susceptible, 3-moderate, 5-High susceptibility                                                                         |
| <b>INFLORESCENCE AND FRUIT</b>         |                           |                                                                                                                                                                                   |
| 31                                     | Flowering pigment pattern | 0: Not pigmented (white), 1: Wing pigmented, 2: Pigmented margins on wing and standard, 3: Wing pigmented, 4: Wing with pigmented upper margin, 5: Completely pigmented, 6: Other |
| 32                                     | Flower colour             | 1: White, 2: Violet, 3: Mauve–pink, 4: Other                                                                                                                                      |
| 33                                     | Days to flowering         | From sowing to the stage when 50% of plants have begun flowering                                                                                                                  |
| 34                                     | Days to first mature pods | From sowing to the stage when 50% of plants have mature pods                                                                                                                      |
